# Supplementary material
Source: PubMed Central journal article supplement (PMC8118916)
Supplement: 1246_tables.pdf [file 1246_tables.pdf]

**On-line Table 1. Distribution of examinations**

|                  | Newborns<br>(N = 34) | Infants<br>(N = 10) | Older Children<br>(N = 27) |
|------------------|----------------------|---------------------|----------------------------|
| CT/CTV           | 19                   | 4                   | 7                          |
| MRI/MRV          | 12                   | 6                   | 17                         |
| CT/CTV & MRI/MRV | 3                    | 0                   | 3                          |

**Note:**—CTV indicates CT venography; MRI/MRV, MR imaging/MR venography.

**On-line Table 3. Location of brain lesions**

|                       | Newborns<br>(N = 34) | Infants<br>(N = 10) | Older Children<br>(N = 27) |
|-----------------------|----------------------|---------------------|----------------------------|
| Frontal lobe          | 9                    | 2                   | 6                          |
| Parietal lobe         | 8                    | 1                   | 2                          |
| Temporal lobe         | 5                    | 1                   | 0                          |
| Occipital lobe        | 4                    | 0                   | 1                          |
| Basal ganglia         | 3                    | 0                   | 0                          |
| Thalamus              | 3                    | 0                   | 3                          |
| Cerebellar hemisphere | 0                    | 2                   | 0                          |

**On-line Table 2. Location of cerebral venous thrombosis in children**

|                         | Newborns<br>(N = 34) | Infants<br>(N = 10) | Older Children<br>(N = 27) |
|-------------------------|----------------------|---------------------|----------------------------|
| Transverse sinus        | 25                   | 9                   | 14                         |
| Superior sagittal sinus | 14                   | 7                   | 15                         |
| Straight sinus          | 12                   | 3                   | 4                          |
| Torcular                | 10                   | 0                   | 0                          |
| Sigmoid sinus           | 4                    | 2                   | 8                          |
| Internal cerebral vein  | 5                    | 0                   | 2                          |
| Vein of Galen           | 4                    | 0                   | 3                          |
| Medullary vein          | 3                    | 0                   | 0                          |
| Internal jugular vein   | 0                    | 0                   | 4                          |

**On-line Table 4. Size of brain lesions**

|                 | Newborns<br>(N = 34) | Infants<br>(N = 10) | Older children<br>(N = 27) |
|-----------------|----------------------|---------------------|----------------------------|
| <1 cm (small)   | 7 (33%)              | 1 (25%)             | 2 (17%)                    |
| 1–3 cm (medium) | 12 (57%)             | 1 (25%)             | 4 (33%)                    |
| >3 cm (large)   | 2 (10%)              | 2 (25%)             | 6 (59%)                    |
| Total           | 21                   | 4                   | 12                         |
